# Supplementary material
Source: Springer Nature journal article supplement (https://www.springermedizin.de/resource/supplementary/12865_2007_137_MOESM1_ESM.pdf/9428588)

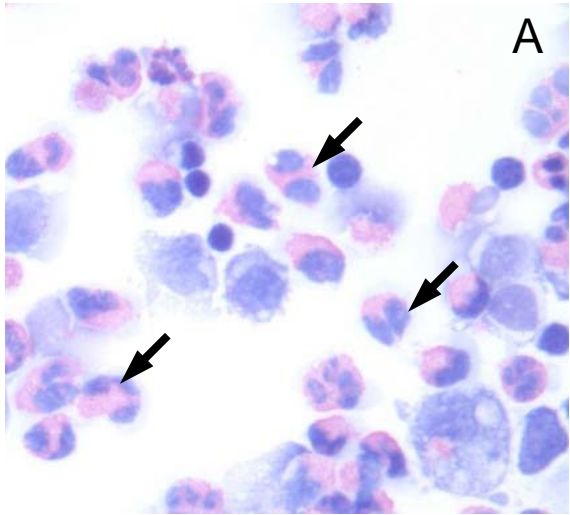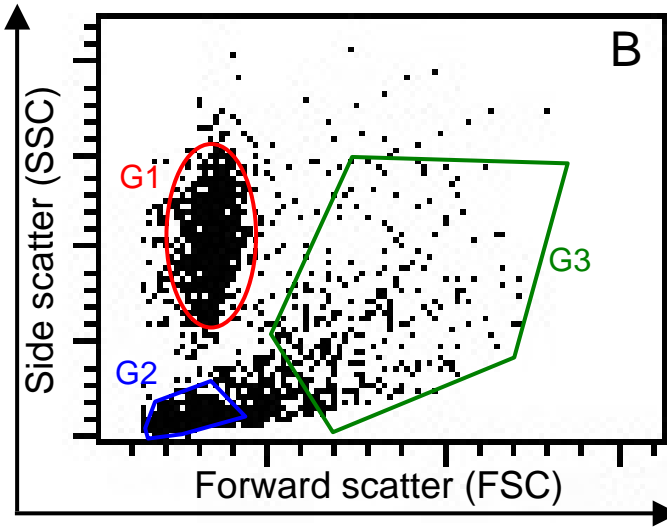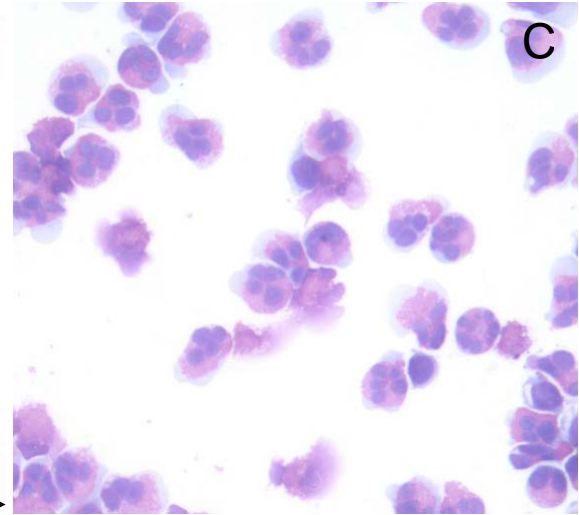

Supplement: MOESM1 [file 9428588]
